# Supplementary material for: Fine Mapping and Candidate Gene Analysis of qSTL3, a Stigma Length-Conditioning Locus in Rice (Oryza sativa L.)
Source: PubMed Central journal article supplement (PMC4452489; doi:10.1371/journal.pone.0127938), 2015-06-01
Supplement: pone.0127938.s001.pdf [file pone.0127938.s001.pdf]

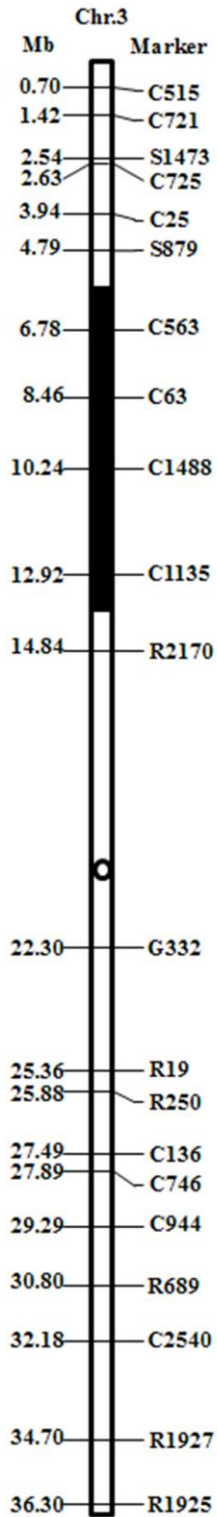

**S1 Fig. Chromosome map based on RFLP markers of chromosome 3 of SSSL14.**

The black bar indicates the fragment from Kasalath, and the remaining was derived from Nipponbare. The black circle marks the position of the centromere.
