# Supplementary material for: Fine Mapping and Candidate Gene Analysis of qSTL3, a Stigma Length-Conditioning Locus in Rice (Oryza sativa L.)
Source: PubMed Central journal article supplement (PMC4452489; doi:10.1371/journal.pone.0127938), 2015-06-01
Supplement: pone.0127938.s002.pdf [file pone.0127938.s002.pdf]

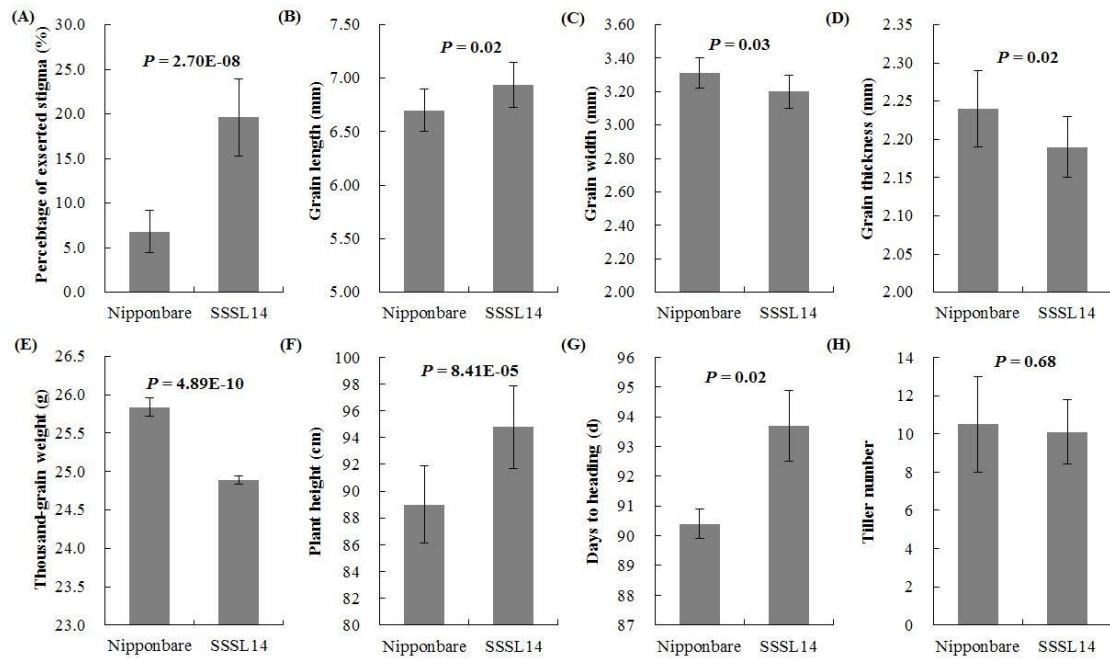

**S2 Fig. Phenotypic evaluations of eight agronomic traits for Nipponbare and SSSL14.** Comparison of the percentage of exerted stigma (A), grain length (B), grain width (C), grain thickness (D), thousand-grain weight (E), plant height (F), days to heading (G) and tiller number (H) of Nipponbare and SSSL14. All data are given as the mean  $\pm$  SE (summer 2013, Nanjing, Jiangsu, China). Each  $P$  value for each trait was obtained from a  $t$  test between Nipponbare and SSSL14.
