# Supplementary material for: Fine Mapping and Candidate Gene Analysis of qSTL3, a Stigma Length-Conditioning Locus in Rice (Oryza sativa L.)
Source: PubMed Central journal article supplement (PMC4452489; doi:10.1371/journal.pone.0127938), 2015-06-01
Supplement: pone.0127938.s003.pdf [file pone.0127938.s003.pdf]

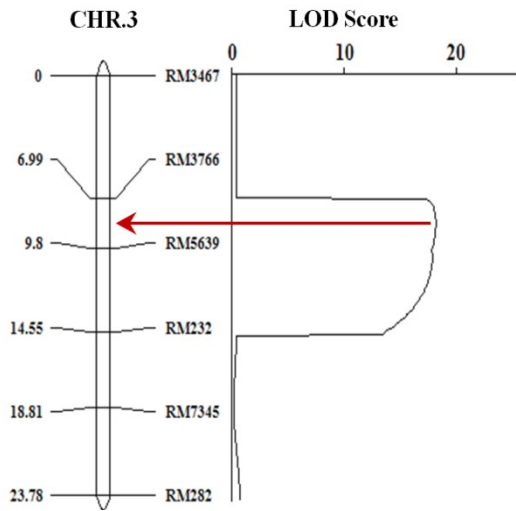

**S3 Fig. QTL mapping of *qSTL3* based on the 220 plants randomly selected from SSSL14/Nipponbare  $F_2$  population.**
