# Supplementary material for: Fine Mapping and Candidate Gene Analysis of qSTL3, a Stigma Length-Conditioning Locus in Rice (Oryza sativa L.)
Source: PubMed Central journal article supplement (PMC4452489; doi:10.1371/journal.pone.0127938), 2015-06-01
Supplement: pone.0127938.s005.pdf [file pone.0127938.s005.pdf]

Nipponbare ATGCTCAAGTGTAGGGCACGCCAGCTAGGAAAAAGATTGAGATCAAGCGCGGGGACAAGAGGTACGAGATGCATGCTTTTCCAAGCGCCACACTACCA 100  
Zhonghua11 ATGGTGAAGTGTAGGGCACGCCAGCTAGGAAAAAGATTGAGATCAAGCGCGGGGACAAGAGGTACGAGATGCATGCTTTTCCAAGCGCCACACTACCA 100

Nipponbare TCTTCAACAAGGCCAATGAGCTCGCTATCCTCTGTGGCGTGATGGTTGCTGTGTTTTTGTCTCTCCCAATGCCAATGGCGGGATTTTCTCATTTGGCTA 200  
Zhonghua11 TCTTCAACAAGGCCAATGAGCTCGCTATCCTCTGTGGCGTGATGGTTGCTGTGTTTTTGTCTCTCCCAATGCCAATGGCGGGATTTTCTCATTTGGCTA 200

Nipponbare CCCATCTGTGAGTCTGTGGCAAATCGCTTCCCTGCGCAATGCTCCAAACAAACACCAGTGTGAGTAGCTCAACCCAAAGCGGGAGGGATGTGGAAATCCGT 300  
Zhonghua11 CCCATCTGTGAGTCTGTGGCAAATCGCTTCCCTGCGCAATGCTCCAAACAAACACCAGTGTGAGTAGCTCAACCCAAAGCGGGAGGGATGTGGAAATCCGT 300

Nipponbare GAACFAGAACCTGAAGAAAGAGAGTTGAAAGAGCATCTACAAGCTTCCACAGATCAGAATAAGCTTCTGCGGGAGGCAATAGCAGCAAGGGATGGAGGGC 400  
Zhonghua11 GAACFAGAACCTGAAGAAAGAGAGTTGAAAGAGCATCTACAAGCTTCCACAGATCAGAATAAGCTTCTGCGGGAGGCAATAGCAGCAAGGGATGGAGGGC 400

Nipponbare AATTGATGCTTCTCCTGCAGAGTGATTGTAGTGTGGTGGGACAAAAGTCTGGTGAGAGGAGGAACAAAATATTGAAGGATAATGCCATGCGTGTCCAT 500  
Zhonghua11 AATTGATGCTTCTCCTGCAGAGTGATTGTAGTGTGGTGGGACAAAAGTCTGGTGAGAGGAGGAACAAAATATTGAAGGATAATGCCATGCGTGTCCAT 500

Nipponbare GTTTTAGCAAAACATAATTTCTATCTGGTTGTAGTGTGCACCCTTGGCTTGGCTCTCCCTGTAATGTTGCTTGTAGGGTTTGTCCATGGGAATTTCT 600  
Zhonghua11 GTTTTAGCAAAACATAATTTCTATCTGGTTGTAGTGTGCACCCTTGGCTTGGCTCTCCCTGTAATGTTGCTTGTAGGGTTTGTCCATGGGAATTTCT 600

Nipponbare TATGATATTTTGGCAAATGATGAGAACAAATTTATCATAAATATGTTGTTGGTTGTCATATTTGCAAGGACTGAGTGGTGTAGATCTATATATTAATATTG 700  
Zhonghua11 TATGATATTTTGGCAAATGATGAGAACAAATTTATCATAAATATGTTGTTGGTTGTCATATTTGCAAGGACTGAGTGGTGTAGATCTATATATTAATATTG 700

Nipponbare GTGGTGTGTGATTTTATTTTACTTCTAGTGTCTCAGTTCCTTTAGACCTTGTTCCTTTTAAATCCAGCTGCTCTAATCTCTGTAATTTGGTGAATTTA 800  
Zhonghua11 GTGGTGTGTGATTTTATTTTACTTCTAGTGTCTCAGTTCCTTTAGACCTTGTTCCTTTTAAATCCAGCTGCTCTAATCTCTGTAATTTGGTGAATTTA 800

Nipponbare TATATTTTGTCTGTGTGATTTATATCTATCTACTTGTGTATGTTTGTGTCATCAATATAGTTTTTCATTTGCGTGGGAACCTTATACCATTTATCTC 900  
Zhonghua11 TATATTTTGTCTGTGTGATTTATATCTATCTACTTGTGTATGTTTGTGTCATCAATATAGTTTTTCATTTGCGTGGGAACCTTATACCATTTATCTC 900

Nipponbare ATTCGATCATTAACCATCAGTTTAACTTTTAAACCTCTTCTCTGCAACATTTTGTCTTCACTCTCTCGTAATCTATTATGTTTCATGTTGAACTTACC 1000  
Zhonghua11 ATTCGATCATTAACCATCAGTTTAACTTTTAAACCTCTTCTCTGCAACATTTTGTCTTCACTCTCTCGTAATCTATTATGTTTCATGTTGAACTTACC 1000

Nipponbare TATCCAATCTTTAAACCCATGATGCATATGCAGGTGAAGCTGAAAGTAGAAGTGAACCTAACATCATAGCCTACGCAAGCGGTGAAAACCTGACATGCTT 1100  
Zhonghua11 TATCCAATCTTTAAACCCATGATGCATATGCAGGTGAAGCTGAAAGTAGAAGTGAACCTAACATCATAGCCTACGCAAGCGGTGAAAACCTGACATGCTT 1100

Nipponbare TCAGATGACACATGTACCATTCTGTCCCATGGGTTTATTGACAATCAACTGGATTTTATGATTTTGAAGTATGATGCCCTTTCTCTGATTCGCATATCAA 1200  
Zhonghua11 TCAGATGACACATGTACCATTCTGTCCCATGGGTTTATTGACAATCAACTGGATTTTATGATTTTGAAGTATGATGCCCTTTCTCTGATTCGCATATCAA 1200

Nipponbare TGGAAAACTCAAAACCGTCTCTAGATTTTGCAGATGACAGTTACGAAGTTCTCTGAATGGCTCAATCATGCTTTCATTTCTAATTTGAGCTCTTCTT 1300  
Zhonghua11 TGGAAAACTCAAAACCGTCTCTAGATTTTGCAGATGACAGTTACGAAGTTCTCTGAATGGCTCAATCATGCTTTCATTTCTAATTTGAGCTCTTCTT 1300

Nipponbare CGTTCCCAAACCTCACTGCTTGTGCATGATATATGCAGGTGGCAGTTGTGCGGTTGTGGTCCGCAATTTCTTGTGGCAATGGGCTTGTATCGGTTGTG 1400  
Zhonghua11 CGTTCCCAAACCTCACTGCTTGTGCATGATATATGCAGGTGGCAGTTGTGCGGTTGTGGTCCGCAATTTCTTGTGGCAATGGGCTTGTATCGGTTGTG 1400

Nipponbare CTGGCTGCTGCAGCAAATACTCTTTGGTTTGGATTGGGGCTGA 1443  
Zhonghua11 CTGGCTGCTGCAGCAAATACTCTTTGGTTTGGATTGGGGCTGA 1443

**S5 Fig. Sequence alignment of *LOC\_Os03g14850* between Nipponbare and Zhonghua11**
