# Supplementary material for: Fine Mapping and Candidate Gene Analysis of qSTL3, a Stigma Length-Conditioning Locus in Rice (Oryza sativa L.)
Source: PubMed Central journal article supplement (PMC4452489; doi:10.1371/journal.pone.0127938), 2015-06-01
Supplement: pone.0127938.s006.pdf [file pone.0127938.s006.pdf]

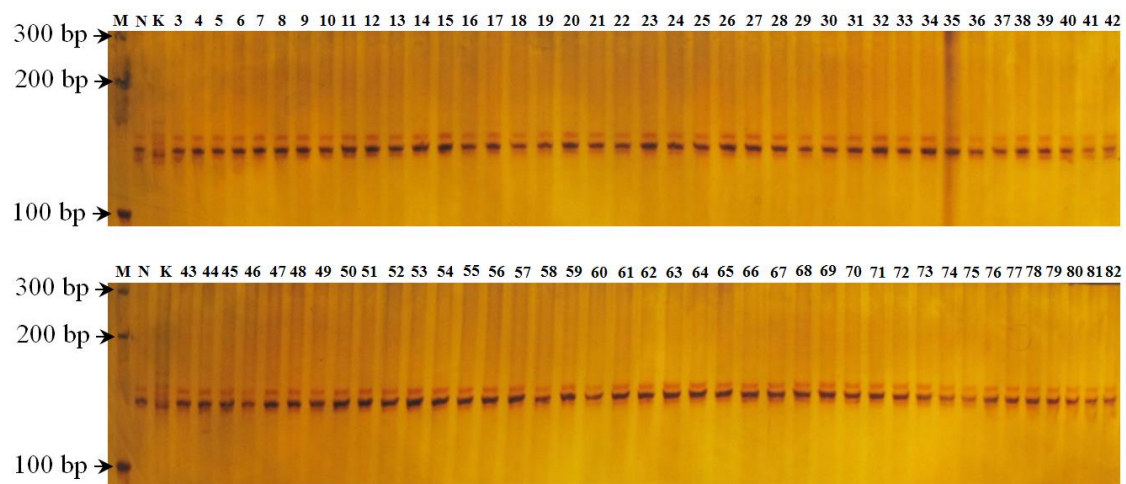

**S6 Fig. The profile amplified by the gene-specific marker LQ30 using total DNA of Nipponbare, Kasalath and the 80 accessions with different stigma lengths. M indicates the DNA marker ladder, N and K indicate Nipponbare and Kasalath, No.3-42 indicate the short stigma accessions, and No.43-82 indicate the long stigma accessions.**
