# Supplementary material for: Fine Mapping and Candidate Gene Analysis of qSTL3, a Stigma Length-Conditioning Locus in Rice (Oryza sativa L.)
Source: PubMed Central journal article supplement (PMC4452489; doi:10.1371/journal.pone.0127938), 2015-06-01
Supplement: pone.0127938.s007.pdf [file pone.0127938.s007.pdf]

**S1 Table. Information of QTLs for percentage of exerted stigma and stigma length identified on short arm of chromosome 3.**

| QTL <sup>1</sup>             | Marker interval | LOD | % of phenotypic variance explained | Positive allele | Reference          |
|------------------------------|-----------------|-----|------------------------------------|-----------------|--------------------|
| <i>qPES-3</i>                | C563-C63        | 4.4 | 16.0                               | Kasalath        | Qiao BJ et al. [8] |
| <i>qSTL3(t)</i> <sup>2</sup> | C563-C63        | 3.4 | 11.8                               | Kasalath        | Uga Y et al. [14]  |

<sup>1</sup> Both *qPES-3* and *qSTL3(t)* were identified in the BIL population derived from Nipponbare/Kasalath//Nipponbare.

<sup>2</sup> All QTLs detected in this reference did not name. We named the QTL for stigma length as *qSTL3(t)*.
