# Supplementary material for: Fine Mapping and Candidate Gene Analysis of qSTL3, a Stigma Length-Conditioning Locus in Rice (Oryza sativa L.)
Source: PubMed Central journal article supplement (PMC4452489; doi:10.1371/journal.pone.0127938), 2015-06-01
Supplement: pone.0127938.s008.pdf [file pone.0127938.s008.pdf]

**S2 Table. Basic information of the accessions used for sequencing analysis.**

| <b>NO.</b> | <b>Accession name</b> | <b>Origin and geographic coordinates ( E, N)</b> | <b>mean±SD</b> |
|------------|-----------------------|--------------------------------------------------|----------------|
| 1          | Nipponbare            | Tsukuba, Ibaraki, Japan (36.03, 140.08)          | 1.72±0.02      |
| 2          | Kasalath              | Karimganj, Assam, Indian (24.87, 92.35)          | 1.96±0.02**    |
| 3          | Zhongjing 9677        | Huaian, Jiangsu, China (118.26, 33.85)           | 1.63±0.01**    |
| 4          | Yanglingdao           | Wuxi, Jiangsu, China (121.31, 31.49)             | 1.64±0.02**    |
| 5          | Jia 159               | Jiaxing, Zhejiang, China (120.76, 30.75)         | 1.66±0.01**    |
| 6          | Nannongjing 005       | Nanjing, Jiangsu, China (118.64, 32.07)          | 1.66±0.02**    |
| 7          | Sanbailitou           | Kunshan, Jiangsu, China (120.98, 31.39)          | 1.67±0.01**    |
| 8          | Zhongjing 212         | Huaian, Jiangsu, China (118.26, 33.85)           | 1.67±0.02**    |
| 9          | 863B                  | Nanjing, Jiangsu, China (118.64, 32.07)          | 1.67±0.02**    |
| 10         | Cuganhuangdao         | Wujiang, Jiangsu, China (120.65, 31.14)          | 1.68±0.02**    |
| 11         | Jianongnuo 2          | Jiading, Shanghai, China (121.26, 30.74)         | 1.68±0.02**    |
| 12         | Yangfujing 7          | Yangzhou, Jiangsu, China (119.41, 32.39)         | 1.68±0.02**    |
| 13         | Ligengqing            | Yixing, Jiangsu, China (119.82, 31.34)           | 1.69±0.02*     |
| 14         | Ebusinuodao           | Wuxi, Jiangsu, China (121.31, 31.49)             | 1.69±0.01**    |
| 15         | Zaoshirihuangdao      | Wuxian, Jiangsu, China (121.63, 31.26)           | 1.69±0.01**    |
| 16         | Wuyujing 3            | Wujin, Jiangsu, China (119.94, 31.70)            | 1.69±0.01**    |
| 17         | Zhendao 99            | Zhenjiang, Jiangsu, China (119.25, 31.64)        | 1.69±0.01**    |
| 18         | Yefenghuang           | Wujiang, Jiangsu, China (120.65, 31.14)          | 1.69±0.02*     |
| 19         | Ludao                 | Lianyungang, Jiangsu, China (119.28, 34.58)      | 1.69±0.03*     |
| 20         | Xiangzhunuo           | Changshu, Jiangsu, China (120.75, 31.65)         | 1.70±0.01      |
| 21         | Shendao 14            | Ji'ning, Shandong, China (116.61, 35.39)         | 1.70±0.01      |
| 22         | Jiangfeng 4           | Jiangyin, Jiangsu, China (120.29, 31.92)         | 1.70±0.02      |
| 23         | Nantouzhong           | Kunshan, Jiangsu, China (120.98, 31.39)          | 1.70±0.02      |
| 24         | Yaxuenuo              | Wuxian, Jiangsu, China (121.63, 31.26)           | 1.70±0.02      |
| 25         | Xiangjing 9407        | Ji'ning, Shandong, China (116.61, 35.39)         | 1.70±0.02      |
| 26         | Sihao 4029            | Suqian, Jiangsu, China (118.26, 33.85)           | 1.70±0.02      |
| 27         | Guozinuo              | Jiading, Shanghai, China (121.26, 30.74)         | 1.71±0.01      |

|    |                  |                                             |              |
|----|------------------|---------------------------------------------|--------------|
| 28 | Shiluqing        | Kunshan, Jiangsu, China (120.98, 31.39)     | 1.71 ±0.01   |
| 29 | Lianjing 9823    | Lianyungang, Jiangsu, China (119.28, 34.58) | 1.71 ±0.01   |
| 30 | Jingnuo(zijian)  | Nanjing, Jiangsu, China (118.64, 32.07)     | 1.71 ±0.02   |
| 31 | 5 jing 20        | Nanjing, Jiangsu, China (118.64, 32.07)     | 1.71 ±0.02   |
| 32 | Xiushui 79       | Jiaxing, Zhejiang, China (120.76, 30.75)    | 1.71 ±0.02   |
| 33 | Zhongjing 131    | Huaian, Jiangsu, China (118.26, 33.85)      | 1.71 ±0.02   |
| 34 | Zhenhan 2        | Zhenzhou, Henan, China (113.69, 34.79)      | 1.71 ±0.02   |
| 35 | Kongqueqing      | Kunshan, Jiangsu, China (120.98, 31.39)     | 1.72 ±0.01   |
| 36 | Yazihuang        | Jinshan, Shanghai, China (121.34, 30.74)    | 1.72 ±0.02   |
| 37 | Xudao 5          | Xuzhou, Jiangsu, China (117.28, 34.21)      | 1.72 ±0.02   |
| 38 | Yangguang 200    | Xuzhou, Jiangsu, China (117.28, 34.21)      | 1.72 ±0.02   |
| 39 | Shendao 808      | Ji'ning, Shandong, China (116.61, 35.39)    | 1.72 ±0.02   |
| 40 | Huajing 5        | Nanjing, Jiangsu, China (118.64, 32.07)     | 1.72 ±0.02   |
| 41 | Yandao8          | Yancheng, Jiangsu, China (120.04, 33.37)    | 1.72 ±0.02   |
| 42 | H37( 6427)       | Nanjing, Jiangsu, China (118.64, 32.07)     | 1.72 ±0.03   |
| 43 | Huangsandannuo   | Wuxian, Jiangsu, China (121.63, 31.26)      | 1.72 ±0.02   |
| 44 | Toudengyishixing | Kunshan, Jiangsu, China (120.98, 31.39)     | 1.72 ±0.03   |
| 45 | Xiaoqingzhong    | Changshu, Jiangsu, China (120.75, 31.65)    | 1.85 ±0.01** |
| 46 | Tieganqing       | Wuxian, Jiangsu, China (121.63, 31.26)      | 1.85 ±0.02** |
| 47 | Longgouzhong     | Qingpu, Shanghai, China (121.13, 31.15)     | 1.85 ±0.02** |
| 48 | Luohanguang      | Jiangyin, Jiangsu, China (120.29, 31.92)    | 1.85 ±0.03** |
| 49 | 5 jing 15        | Nanjing, Jiangsu, China (118.64, 32.07)     | 1.85 ±0.03** |
| 50 | Kaiqing          | Wuxian, Jiangsu, China (121.63, 31.26)      | 1.86 ±0.02** |
| 51 | Ningjing 2       | Nanjing, Jiangsu, China (118.64, 32.07)     | 1.86 ±0.02** |
| 52 | Baikenuo         | Wuxian, Jiangsu, China (121.63, 31.26)      | 1.87 ±0.01** |
| 53 | Xiaobaiyedao     | Wuxi, Jiangsu, China (121.31, 31.49)        | 1.88 ±0.02** |
| 54 | Zijianxian3      | Nanjing, Jiangsu, China (118.64, 32.07)     | 1.89 ±0.02** |
| 55 | Yanjing 9        | Yancheng, Jiangsu, China (120.04, 33.37)    | 1.89 ±0.02** |
| 56 | Vietnam-77       | Hue, Vietnam (16.46, 107.58)                | 1.90 ±0.02** |

|    |                 |                                             |             |
|----|-----------------|---------------------------------------------|-------------|
| 57 | Baoxintaihuqing | Wujiang, Jiangsu, China (120.65, 31.14)     | 1.90±0.03** |
| 58 | Hongjiaozhan    | Guangzhou, Guangdong, China (113.36, 23.15) | 1.92±0.02** |
| 59 | II -32B         | Changsha, Hunan, China (113.09, 28,20)      | 1.93±0.03** |
| 60 | Hongmangshajing | Kunshan, Jiangsu, China (120.98, 31.39)     | 1.94±0.01** |
| 61 | Wanyedao        | Wuxian, Jiangsu, China (121.63, 31.26)      | 1.95±0.02** |
| 62 | Huangsandan     | Wujiang, Jiangsu, China (120.65, 31.14)     | 1.95±0.02** |
| 63 | Wuxiangjing 14  | Wujin, Jiangsu, China (119.94, 31.70)       | 1.95±0.02** |
| 64 | Beidao4         | Suihua, Heilongjiang, China (127.18, 46.89) | 2.01±0.03** |
| 65 | Wumangzaodao    | Changshu, Jiangsu, China (120.75, 31.65)    | 2.04±0.03** |
| 66 | Beidao3         | Suihua, Heilongjiang, China (127.18, 46.89) | 2.07±0.02** |
| 67 | Vietnam-19      | Hue, Vietnam (16.47, 107.58)                | 2.13±0.02** |
| 68 | Yuetai B        | Guangzhou, Guangdong, China (113.36, 23.15) | 2.13±0.04** |
| 69 | A7444           | Changshu, Jiangsu, China (120.75, 31.65)    | 2.09±0.03   |
| 70 | Tongjing 109    | Nantong, Jiangsu, China (120.89, 31.98)     | 2.15±0.03** |
| 71 | Yangdao 6       | Yangzhou, Jiangsu, China (119.41, 32.39)    | 2.19±0.02** |
| 72 | Vietnam-50      | Hue, Vietnam (16.47, 107.58)                | 2.20±0.03** |
| 73 | H35             | Nanjing, Jiangsu, China (118.64, 32.07)     | 2.22±0.02** |
| 74 | Vietnam-3       | Hue, Vietnam (16.47, 107.58)                | 2.25±0.02** |
| 75 | Vietnam-84      | Hue, Vietnam (16.47, 107.58)                | 2.30±0.03** |
| 76 | Vietnam-9       | Hue, Vietnam (16.47, 107.58)                | 2.34±0.03** |
| 77 | Huanghuazhan    | Guangzhou, Guangdong, China (113.36, 23.15) | 2.46±0.03** |
| 78 | Vietnam-41      | Hue, Vietnam (16.47, 107.58)                | 2.51±0.04** |
| 79 | Nongxiang 21    | Changsha, Hunan, China (113.09, 28,20)      | 2.60±0.03** |
| 80 | Xiangwanxian17  | Changsha, Hunan, China (113.09, 28,20)      | 2.64±0.05** |
| 81 | Nongxiang 26    | Changsha, Hunan, China (113.09, 28,20)      | 2.67±0.04** |
| 82 | Yuzhenxiang     | Changsha, Hunan, China (113.09, 28,20)      | 2.70±0.03** |

No.1-2 are the original parents of the fine mapping population, No.3-42 are the accessions with short stigma length, and No.43-82 are the accessions with long stigma length. All stigma length data are given as the mean ± SD (summer 2014, Nanjing,

Jiangsu, China). \*, \*\* indicate the least significant difference at a 0.05 and 0.01 probability level compared with Nipponbare by *t* test, respectively.
